# Supplementary material
Source: PubMed Central journal article supplement (PMC3566778)
Supplement: NIHMS368600-supplement-Supp_Data_S1.pdf [file NIHMS368600-supplement-Supp_Data_S1.pdf]

Miller et al. Data Supplement. Diamond and Forrester classification of the pretest probability of coronary disease

| Age, yr | Typical angina |       | Atypical angina |       | Nonanginal pain |       |
|---------|----------------|-------|-----------------|-------|-----------------|-------|
|         | Men            | Women | Men             | Women | Men             | Women |
| 30-39   | 69.7%          | 25.8% | 21.8%           | 4.2%  | 5.2%            | 0.8%  |
| 40-49   | 87.3%          | 55.2% | 46.1%           | 13.3% | 14.1%           | 2.8%  |
| 50-59   | 92.0%          | 79.4% | 58.9%           | 32.4% | 21.5%           | 8.4%  |
| 60-69   | 94.3%          | 90.6% | 67.1%           | 54.4% | 28.1%           | 18.6% |

**Source:**

Diamond GA, Forrester JS. Analysis of probability as an aid in the clinical diagnosis of coronary-artery disease. *N Engl J Med* 1979;300:1350-8.
